# Supplementary material for: A probiotic nanozyme hydrogel regulates vaginal microenvironment for Candida vaginitis therapy
Source: PubMed Central journal article supplement — Sci Adv. 2023 May 17;9(20):eadg0949. doi: 10.1126/sciadv.adg0949 (PMC10191424; doi:10.1126/sciadv.adg0949), 2023-05-17
Supplement: sciadv.adg0949_sm.pdf [file sciadv.adg0949_sm.pdf]

Supplementary Materials for

**A probiotic nanozyme hydrogel regulates vaginal microenvironment for  
*Candida* vaginitis therapy**

Gen Wei *et al.*

Corresponding author: Hui Wei, weihui@nju.edu.cn

*Sci. Adv.* **9**, eadg0949 (2023)  
DOI: 10.1126/sciadv.adg0949

**This PDF file includes:**

Figs. S1 to S32  
Table S1

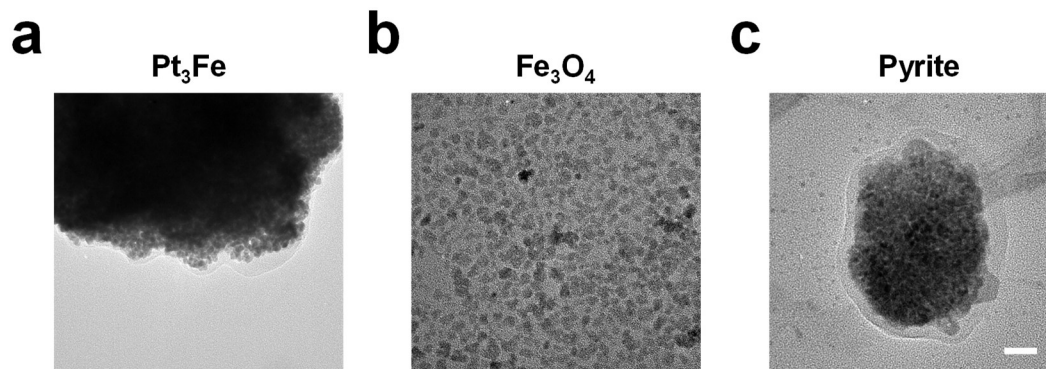

**Fig. S1. TEM images of Pt<sub>3</sub>Fe (a), Fe<sub>3</sub>O<sub>4</sub> (b), and Pyrite FeS<sub>2</sub> (c) nanozymes. Scale bar: 20 nm.**

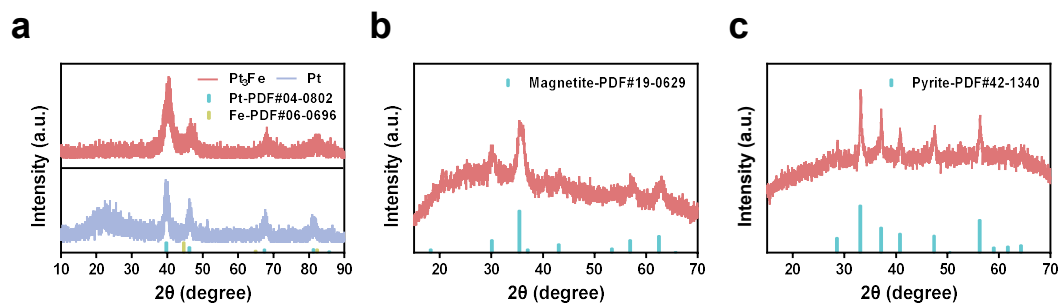

**Fig. S2. XRD patterns of Pt<sub>3</sub>Fe (a), Fe<sub>3</sub>O<sub>4</sub> (b), and Pyrite FeS<sub>2</sub> (c) nanozymes.** The lines at the bottom mark the reference patterns of Pt (JCPDS card number 04-0802), Fe (JCPDS card number 06-0696), Magnetite Fe<sub>3</sub>O<sub>4</sub> (JCPDS card number 19-0629), and Pyrite FeS<sub>2</sub> (JCPDS card number 42-1340).

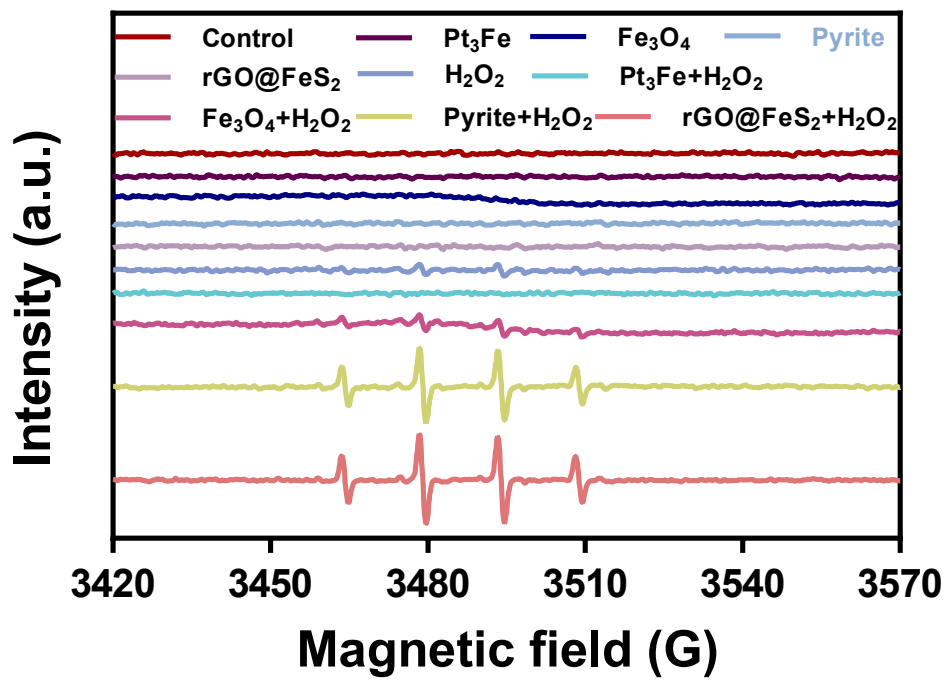

Fig. S3. EPR spectra monitoring the formation of  $\cdot\text{OH}$  among Pt<sub>3</sub>Fe, Fe<sub>3</sub>O<sub>4</sub>, Pyrite FeS<sub>2</sub>, and rGO@FeS<sub>2</sub> nanozymes with H<sub>2</sub>O<sub>2</sub> (80  $\mu\text{M}$ ).

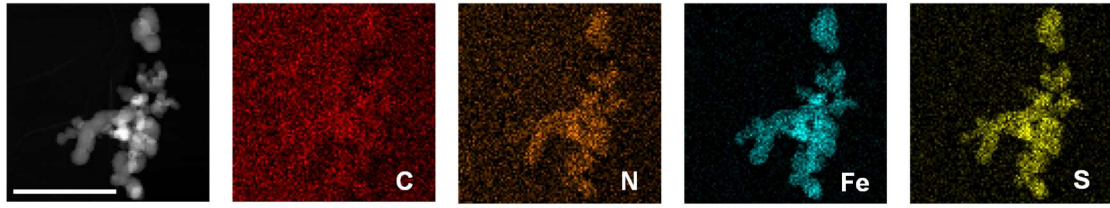

**Fig. S4.** Element mapping of rGO@FeS<sub>2</sub> nanozymes. Scale bar: 500 nm.

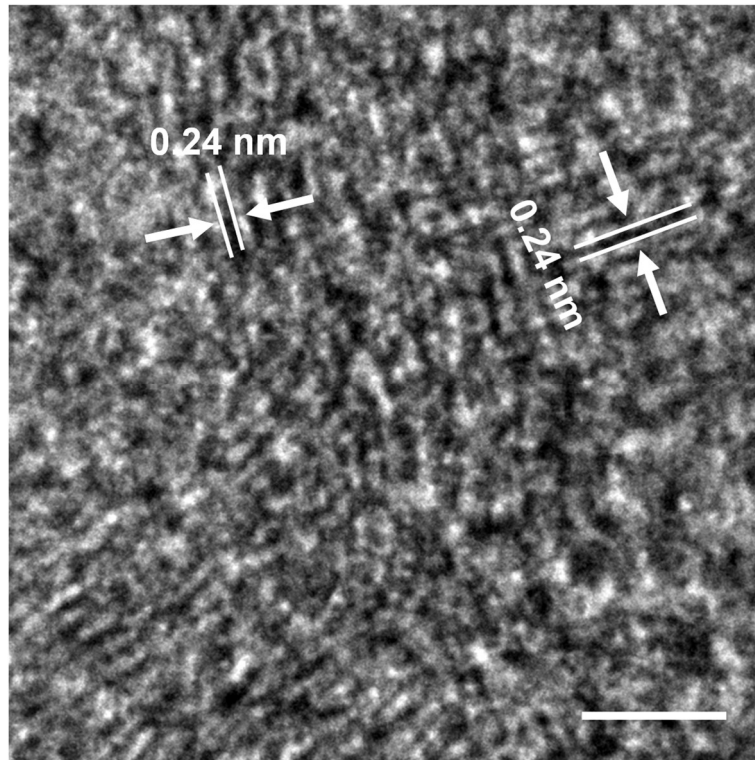

**Fig. S5.** HRTEM image of rGO@FeS<sub>2</sub> nanozymes. Scale bar: 5 nm.

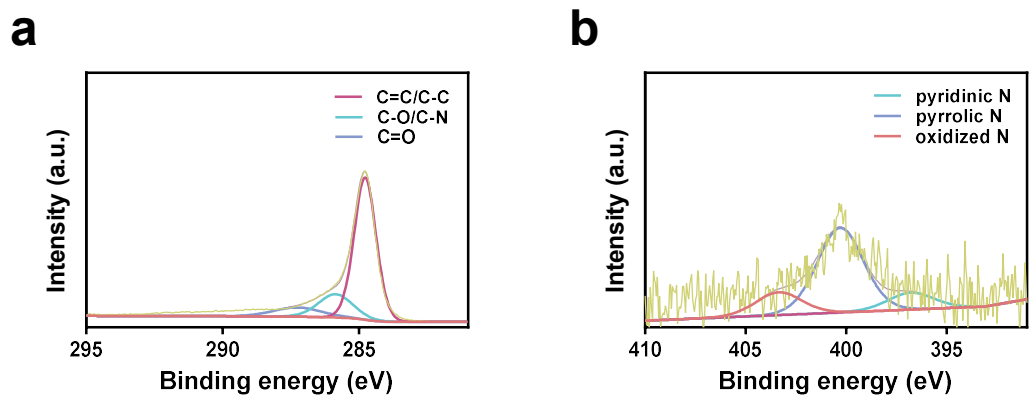

Fig. S6. XPS spectra for C 1s (a) and N 1s (b) regions of rGO@FeS<sub>2</sub> nanozymes.

**a**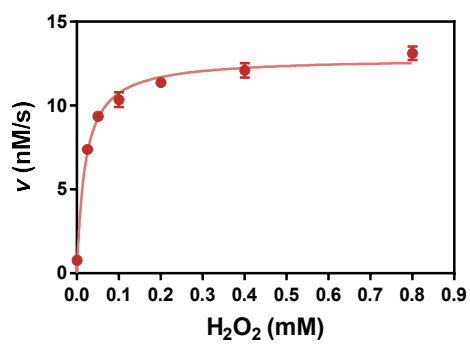**b**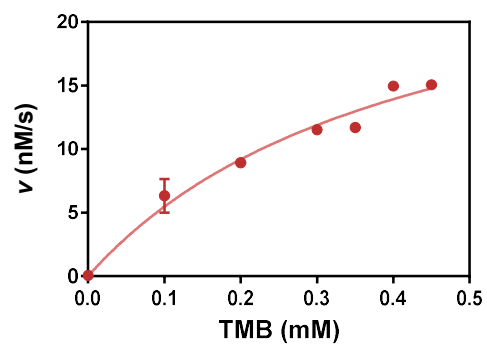

**Fig. S7. Michaelis–Menten plots with varying concentrations of  $\text{H}_2\text{O}_2$  (a) and TMB (b) as substrates for the POD-like activity of  $\text{rGO@FeS}_2$  nanozymes.**



**a**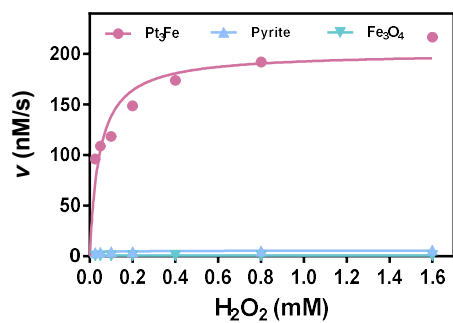**b**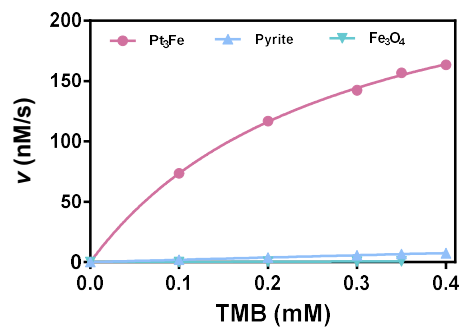

**Fig. S8. Michaelis–Menten plots with varying concentrations of  $\text{H}_2\text{O}_2$  (a) and TMB (b) as substrates for the POD-like activity of several other nanozymes (Pt<sub>3</sub>Fe, Pyrite, and Fe<sub>3</sub>O<sub>4</sub> nanozymes). The concentration of Pt<sub>3</sub>Fe nanozymes was diluted 20-fold under the same iron content.**

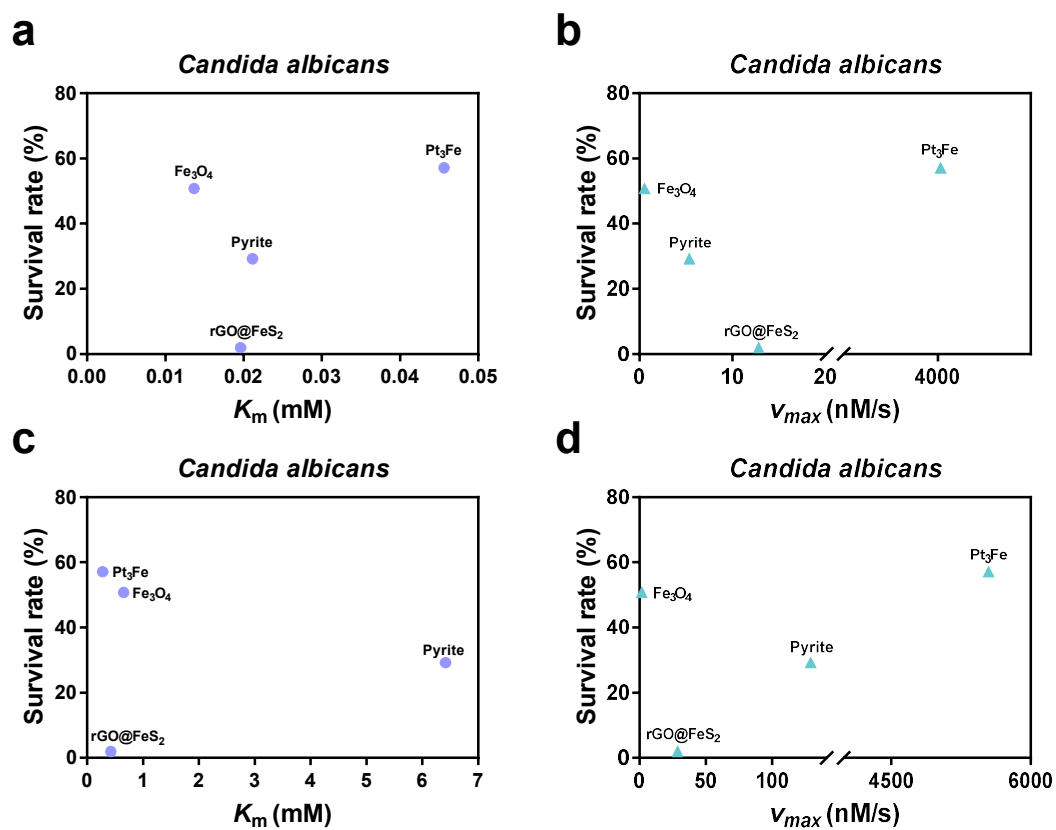

**Fig. S9.** Plots showing the relationship between *anti-Candida albicans* activity and the kinetics data of four POD-like nanozymes with  $\text{H}_2\text{O}_2$  (a, b) or TMB (c, d) as substrate.

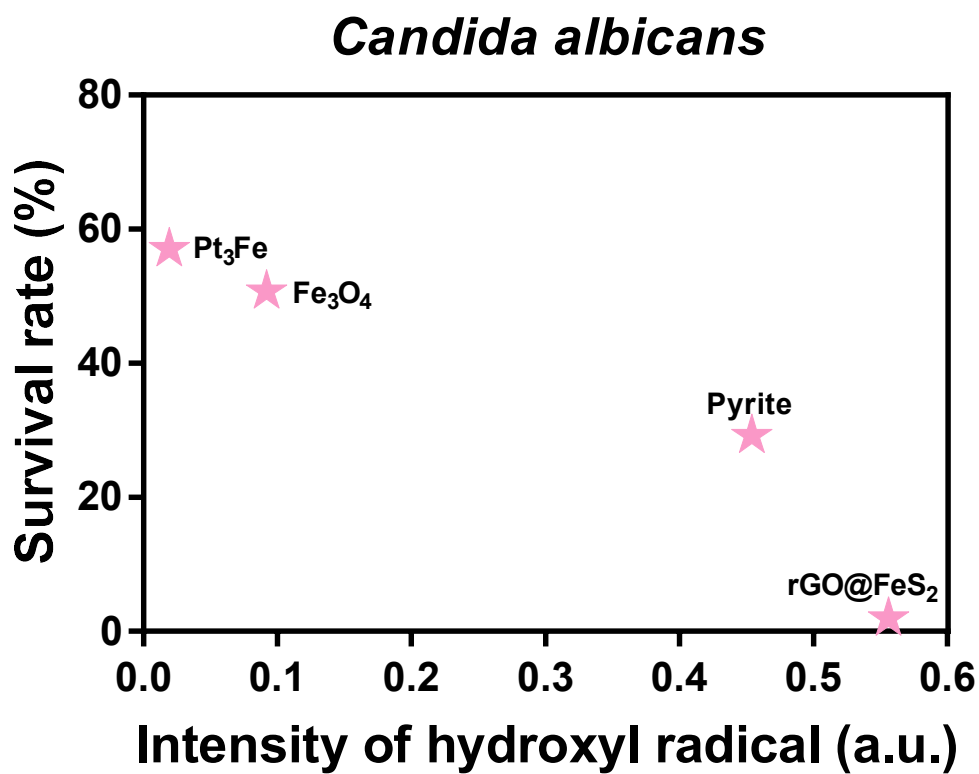

Fig. S10. A plot showing the relationship between the formation of  $\cdot\text{OH}$  and anti-*Candida albicans* activities among Pt<sub>3</sub>Fe, Fe<sub>3</sub>O<sub>4</sub>, Pyrite FeS<sub>2</sub>, and rGO@FeS<sub>2</sub> nanozymes with H<sub>2</sub>O<sub>2</sub> (80  $\mu\text{M}$ ).

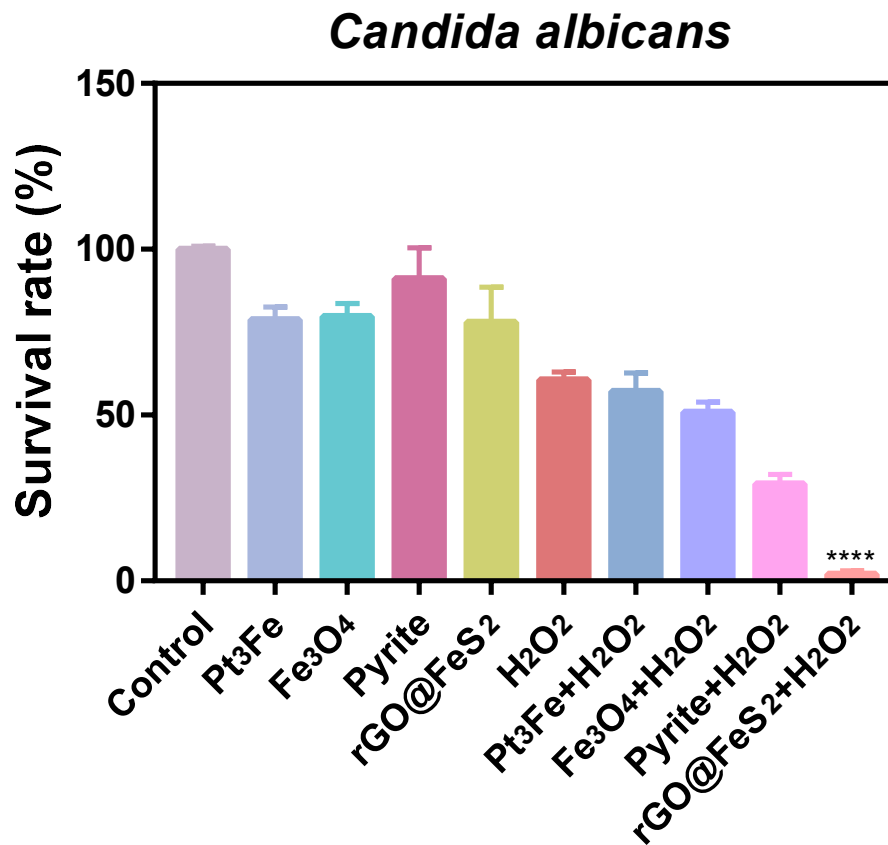

**Fig. S11.** Comparison of anti-*Candida albicans* activities of different nanozymes after indicated treatments. Data are presented as mean  $\pm$  SD (n = 3).

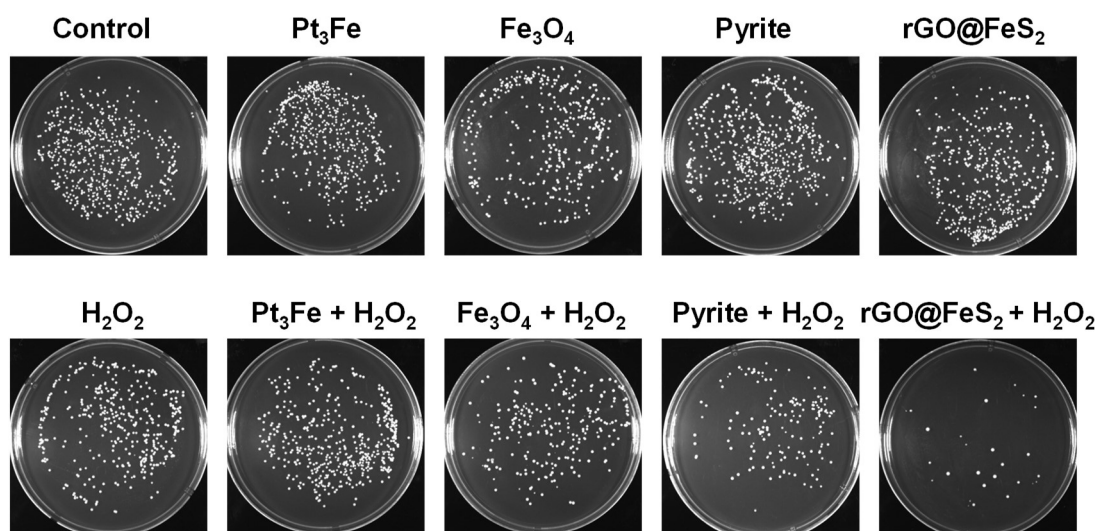

**Fig. S12. Digital images of *Candida albicans* colonies after indicated treatments.**

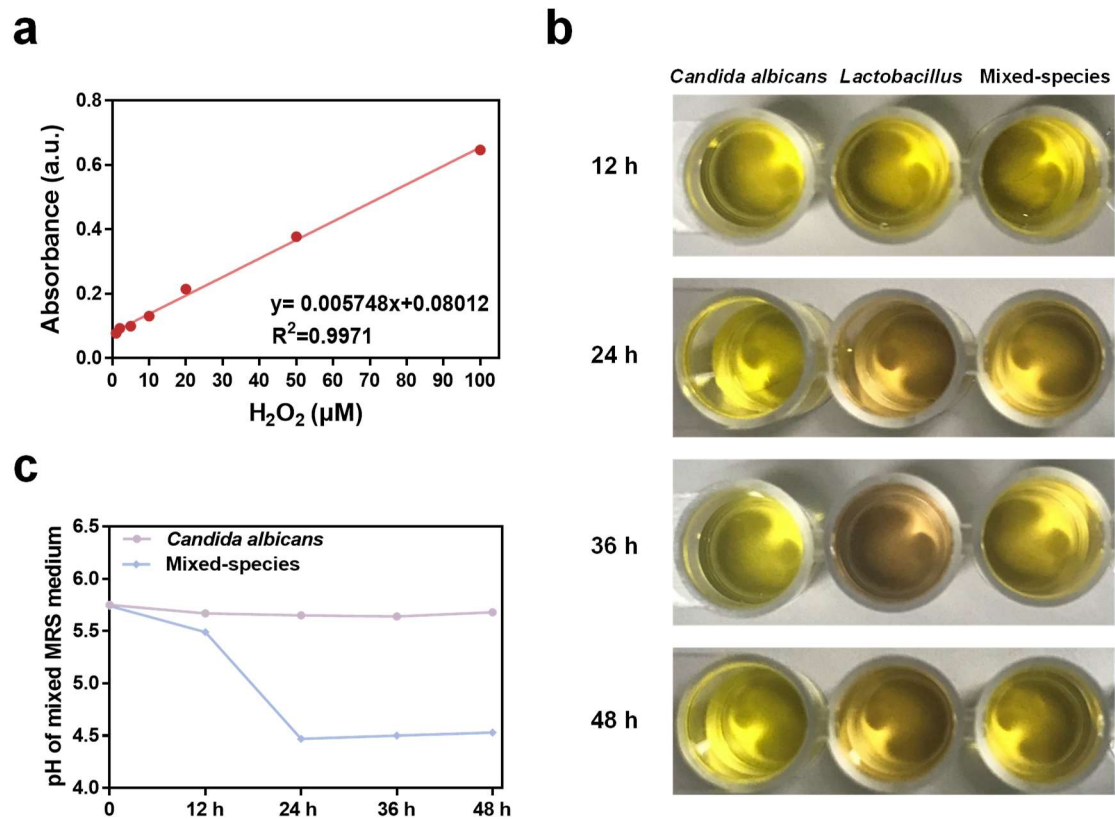

**Fig. S13. Determination of H<sub>2</sub>O<sub>2</sub> and pH change of MRS medium after different incubation times.** The amounts of H<sub>2</sub>O<sub>2</sub> were detected via the following principle: H<sub>2</sub>O<sub>2</sub> first reacts with Fe<sup>2+</sup> to produce Fe<sup>3+</sup>; then, the Fe<sup>3+</sup> reacts with xylenol orange to form a purple product. **a, b**, H<sub>2</sub>O<sub>2</sub> standard curve (**a**) and color changes of substrate after reacting with H<sub>2</sub>O<sub>2</sub> for different times in MRS medium containing *Candida albicans*, *Lactobacillus* and mixed-species (**b**). **c**, pH changes of MRS medium in *Candida albicans* and mixed-species groups after different incubation times. The culture conditions were microaerophilic.

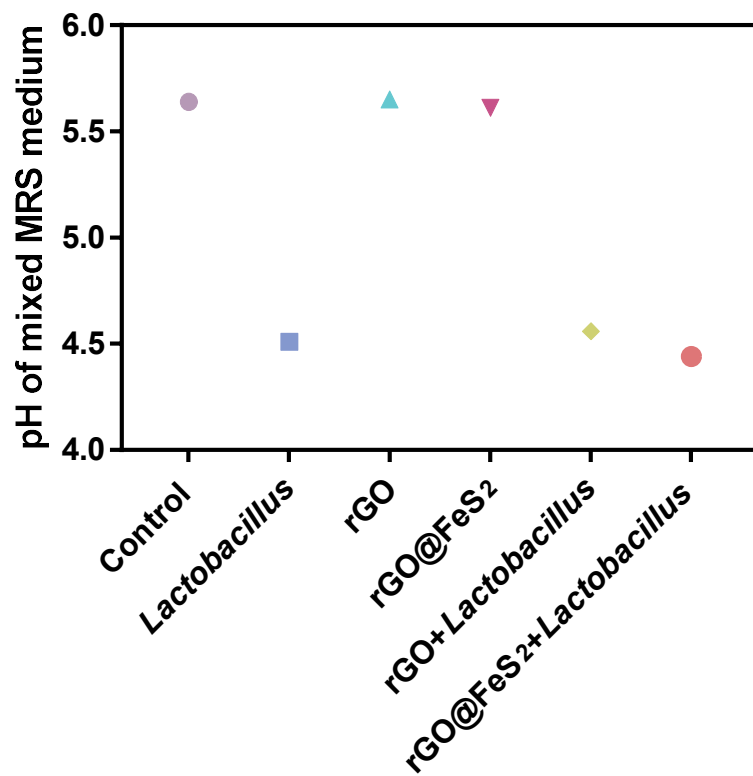

Fig. S14. pH of MRS medium in the indicated groups.

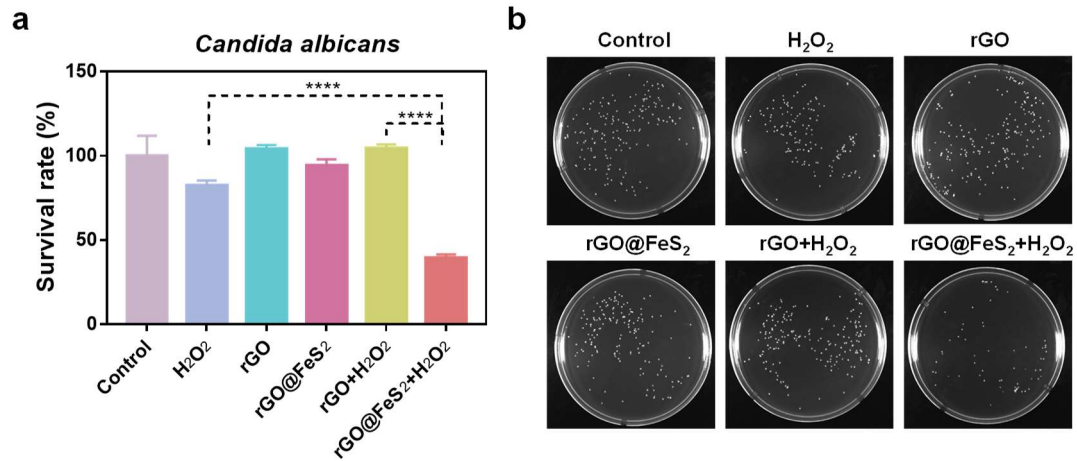

**Fig. S15. Anti-*Candida albicans* activity of rGO@FeS<sub>2</sub> with a lower concentration of H<sub>2</sub>O<sub>2</sub>.** Antifungal effects (a) and digital images of *Candida albicans* colonies (b) after indicated treatments. A 30  $\mu$ M amount of H<sub>2</sub>O<sub>2</sub>, rGO and rGO@FeS<sub>2</sub> at 25  $\mu$ g/mL was used for anti-*Candida albicans* at 37 °C for 120 min. Data are presented as mean  $\pm$  SD (n = 3).



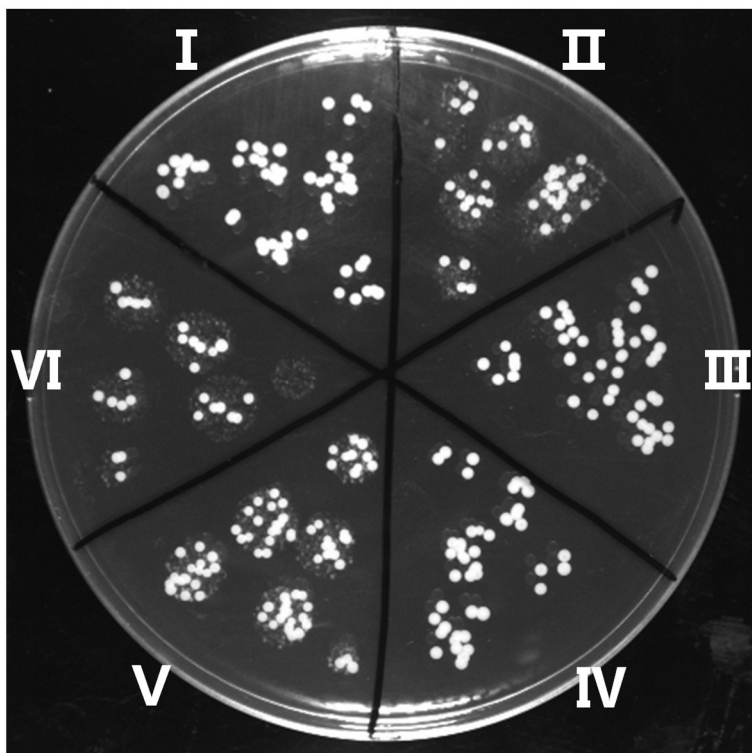

**Fig. S16. Digital images of *Candida albicans* and *Lactobacillus* colonies after different treatments.** I, Control; II, *Lactobacillus*-treated; III, rGO-treated; IV, rGO@FeS<sub>2</sub>-treated; V, rGO + *Lactobacillus*-treated; VI, rGO@FeS<sub>2</sub> + *Lactobacillus*-treated. The co-incubation time was 24 h. *Lactobacillus* (small and transparent) and *Candida albicans* (large and milky).

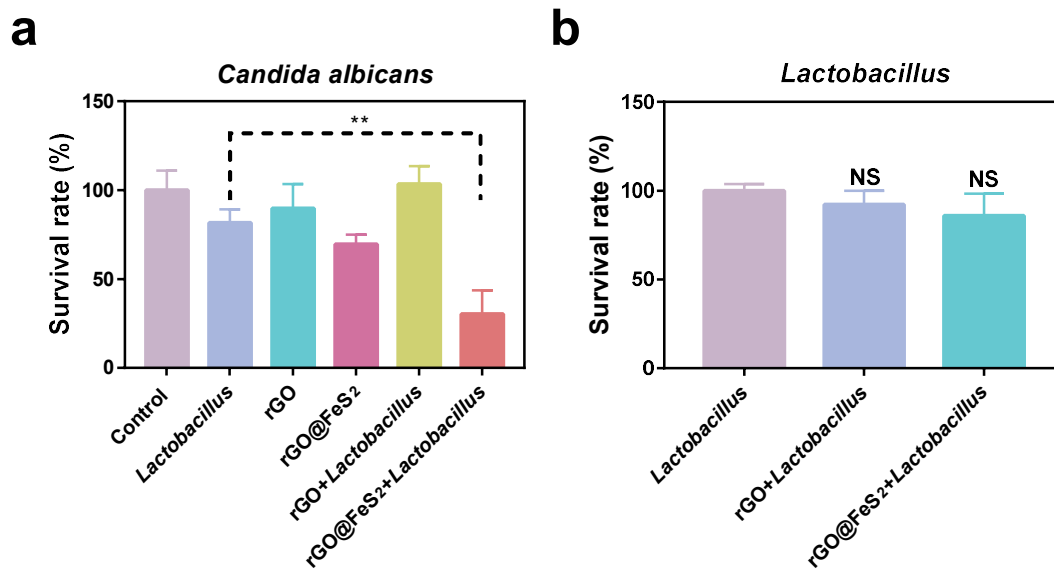

**Fig. S17.** *Candida albicans* cell viability (a) and *Lactobacillus* cell viability (b) in the indicated groups. Data are presented as mean  $\pm$  SD (n = 3).

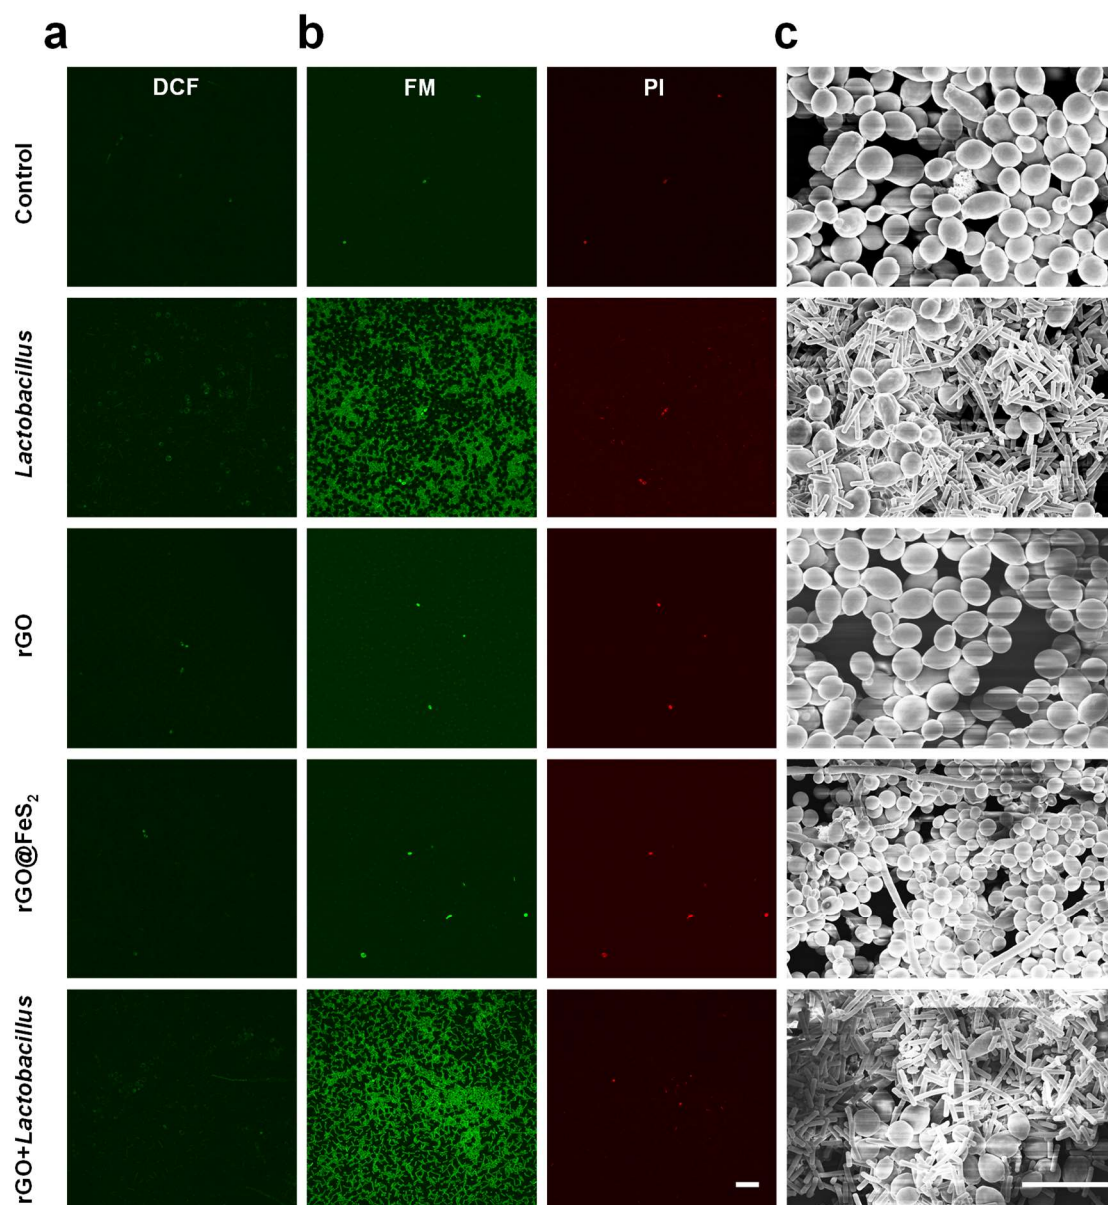

**Fig. S18.** ROS level (DCF) (a), cell viability (FM and PI staining) (b), and SEM images of *Candida albicans* and *Lactobacillus* (c) in different groups. The concentration of rGO was 25  $\mu\text{g/mL}$ . The co-incubation time was 24 h. Scale bar: 20  $\mu\text{m}$  (Left), 10  $\mu\text{m}$  (Right).

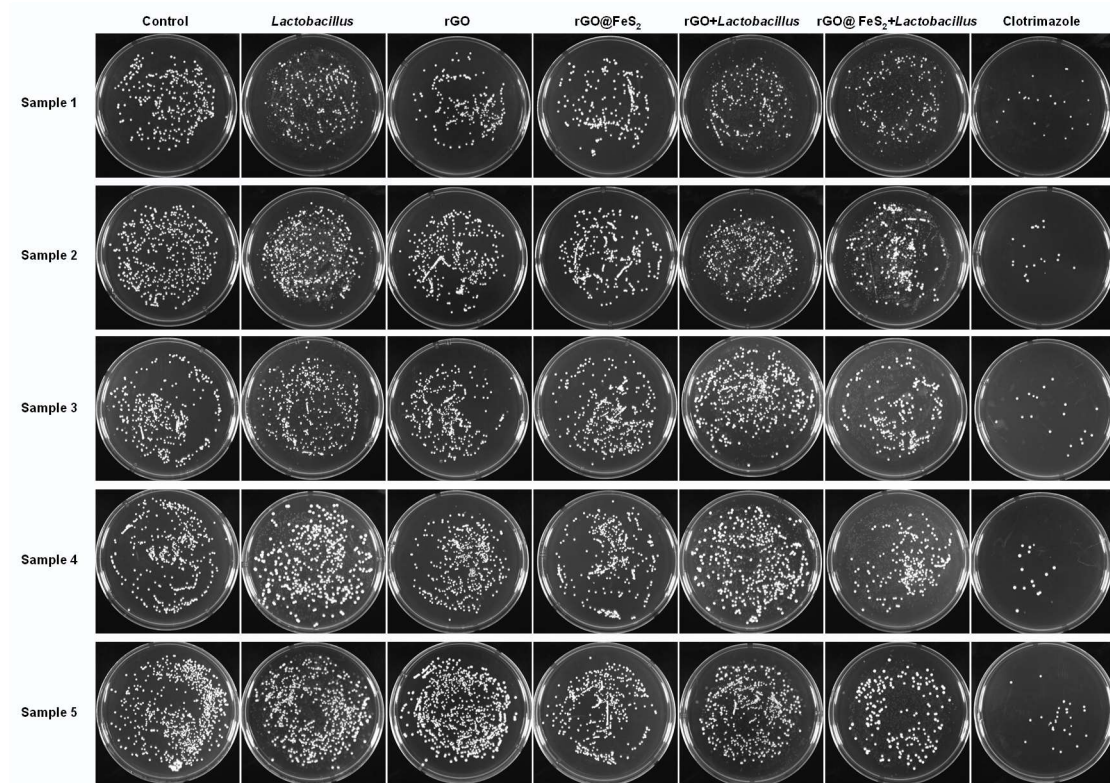

**Fig. S19. Digital images of clinically isolated *Candida albicans* after indicated treatments.** The co-incubation time was 24 h. *Lactobacillus* (small and transparent) and *Candida albicans* (large and milky).

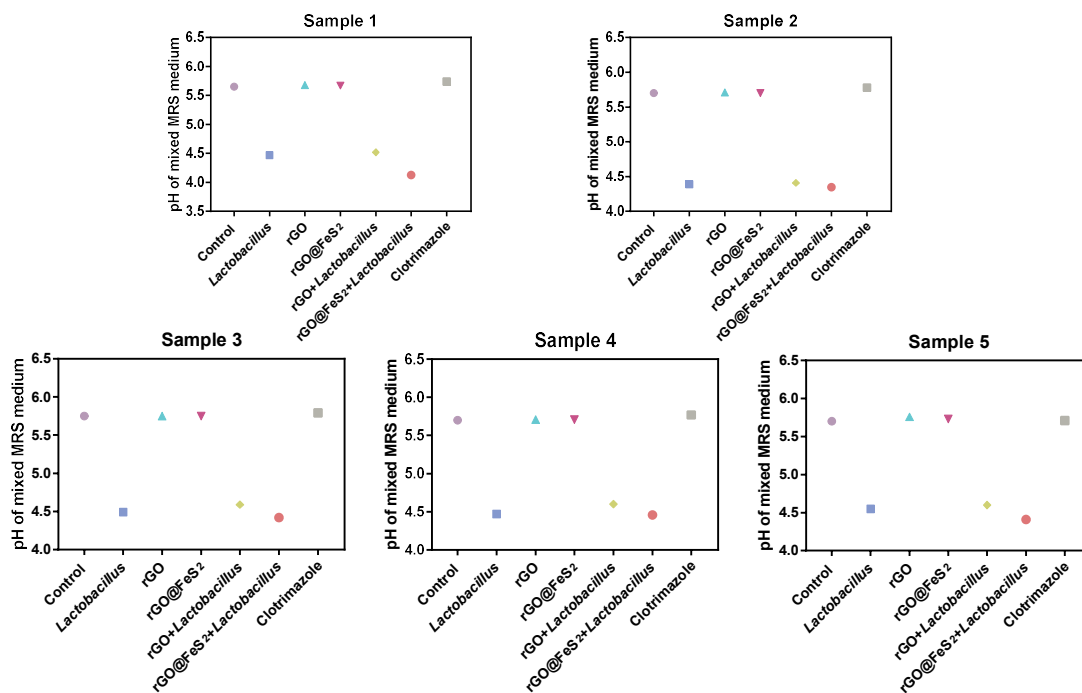

**Fig. S20.** pH of MRS medium incubated with clinically isolated *Candida albicans* for 24 h, followed by indicated treatments.

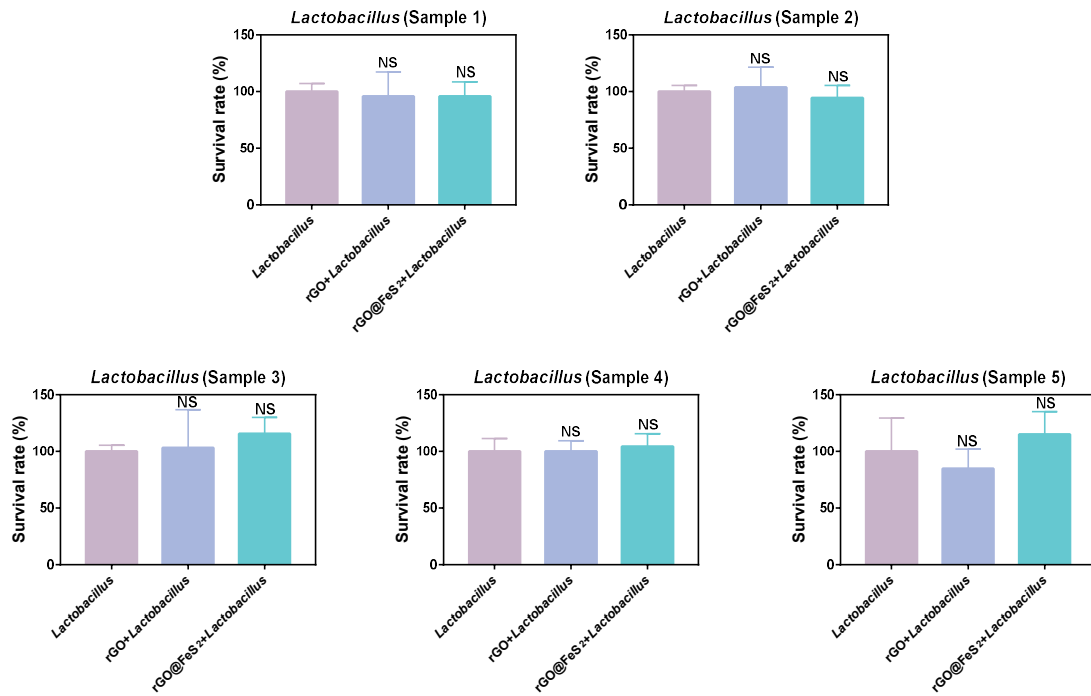

**Fig. S21.** *Lactobacillus* cell viability incubated with clinically isolated *Candida albicans* for 24 h, followed by indicated treatments. Data are presented as mean  $\pm$  SD (n = 3).

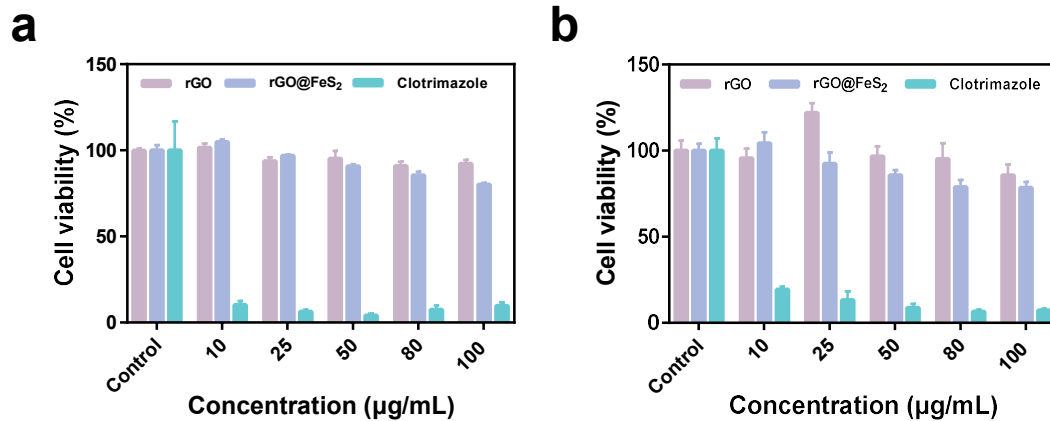

**Fig. S22.** Cell viability of NIH/3T3 cells (a) and L02 cells (b) after incubation for 24 h with different concentrations of rGO, rGO@FeS<sub>2</sub>, and Clotrimazole. Data are presented as mean  $\pm$  SD (n = 3).

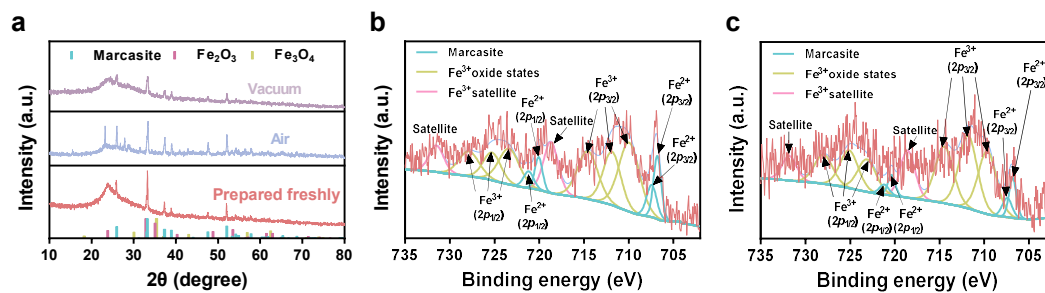

**Fig. S23. XRD patterns and XPS spectra for Fe 2p of rGO@FeS<sub>2</sub> nanozymes during storage.** **a**, XRD patterns of rGO@FeS<sub>2</sub> after twelve days of storage in vacuum and air. The lines at the bottom mark the reference patterns of marcasite FeS<sub>2</sub> (JCPDS card number 74-1051), Fe<sub>2</sub>O<sub>3</sub> (JCPDS card number 88-2359), and Fe<sub>3</sub>O<sub>4</sub> (JCPDS card number 72-2303). **b**, **c**, XPS spectra for Fe 2p of rGO@FeS<sub>2</sub> after twelve days of storage in vacuum (**b**) and air (**c**).



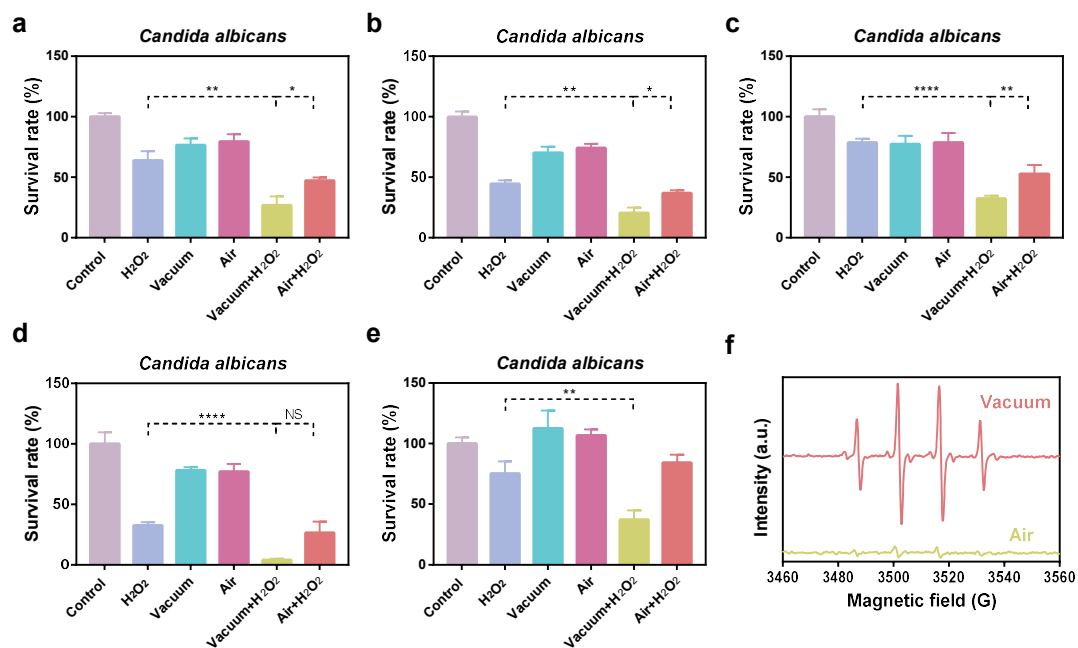

**Fig. S24. Anti-*Candida albicans* and POD-like activities of oxidized rGO@FeS<sub>2</sub>.** **a-e**, Antifungal effects of oxidized rGO@FeS<sub>2</sub> with H<sub>2</sub>O<sub>2</sub> on *Candida albicans* in vacuum and air for 1 (**a**), 3 (**b**), 6 (**c**), 12 (**d**), and 30 (**e**) days, respectively. **f**, EPR monitoring the generation of  $\cdot\text{OH}$  by rGO@FeS<sub>2</sub> stored in air and vacuum for 12 days in the presence of H<sub>2</sub>O<sub>2</sub>. Data are presented as mean  $\pm$  SD (n = 3).

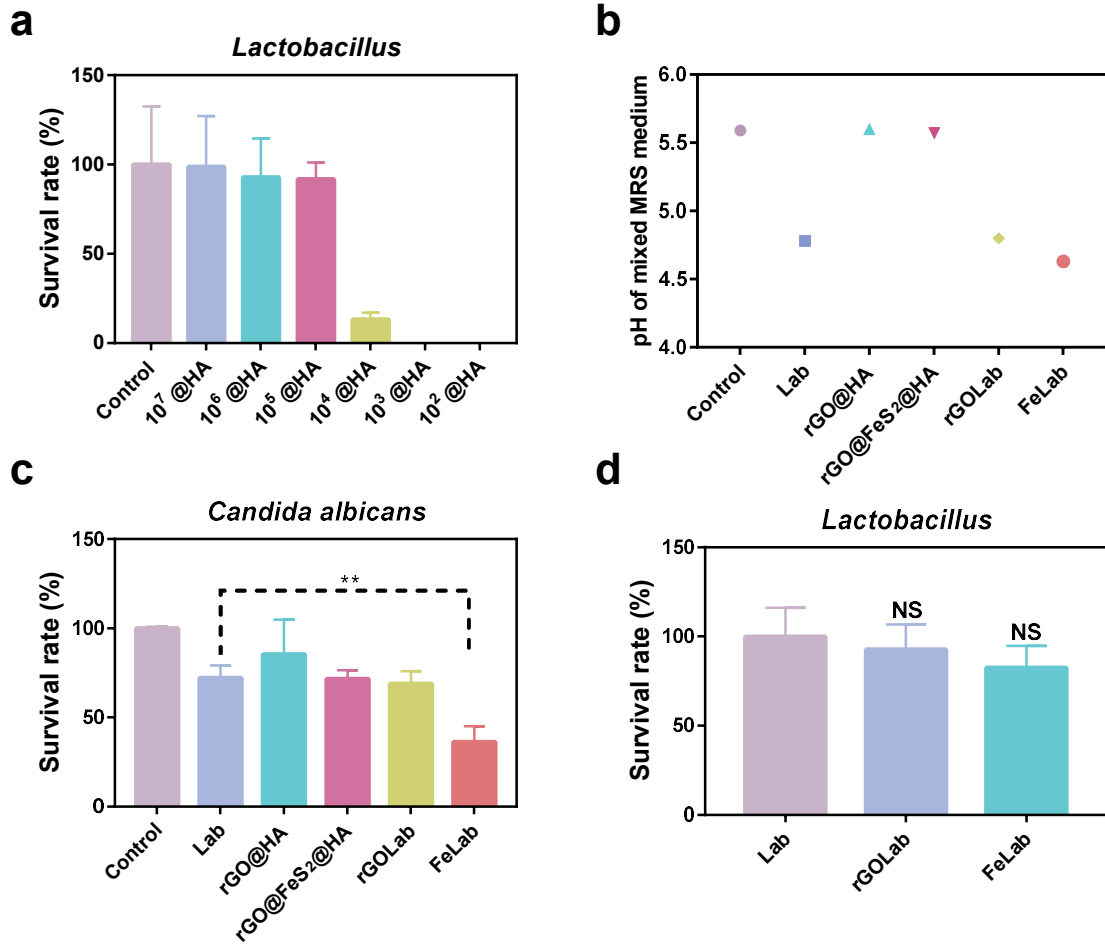

**Fig. S25. Effects of FeLab on *Candida albicans* and *Lactobacillus*.** **a**, Effects of HA coating on *Lactobacillus* cell viability. **b-d**, pH of MRS medium (**b**), *Candida albicans* cell viability (**c**) and *Lactobacillus* cell viability (**d**) after indicated treatments. Data are presented as mean  $\pm$  SD (n = 3).

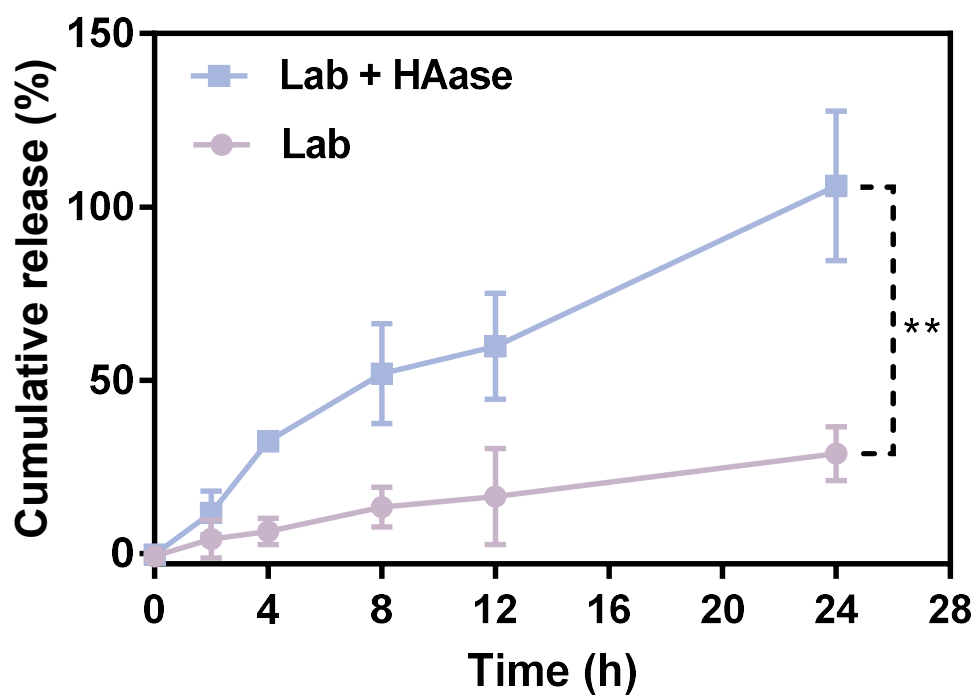

**Fig. S26. Release profile of *Lactobacillus* from Lab with/without HAase solutions.** The concentration of HAase was 150 U/mL. Data are presented as mean  $\pm$  SD (n = 3).

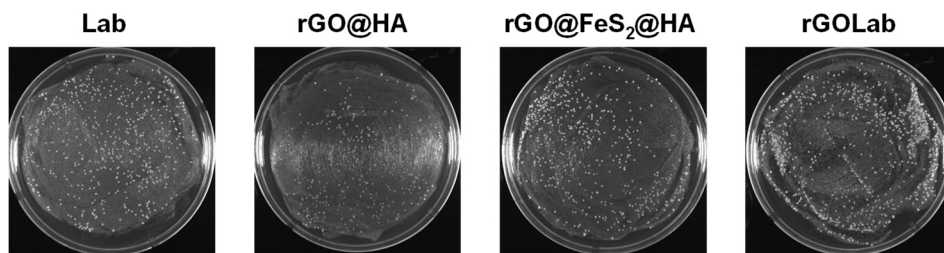

**Fig. S27. Digital images of *Candida albicans* colonies in the vaginal washes after Lab, rGO@HA, rGO@FeS<sub>2</sub>@HA, and rGOLab treatments.**

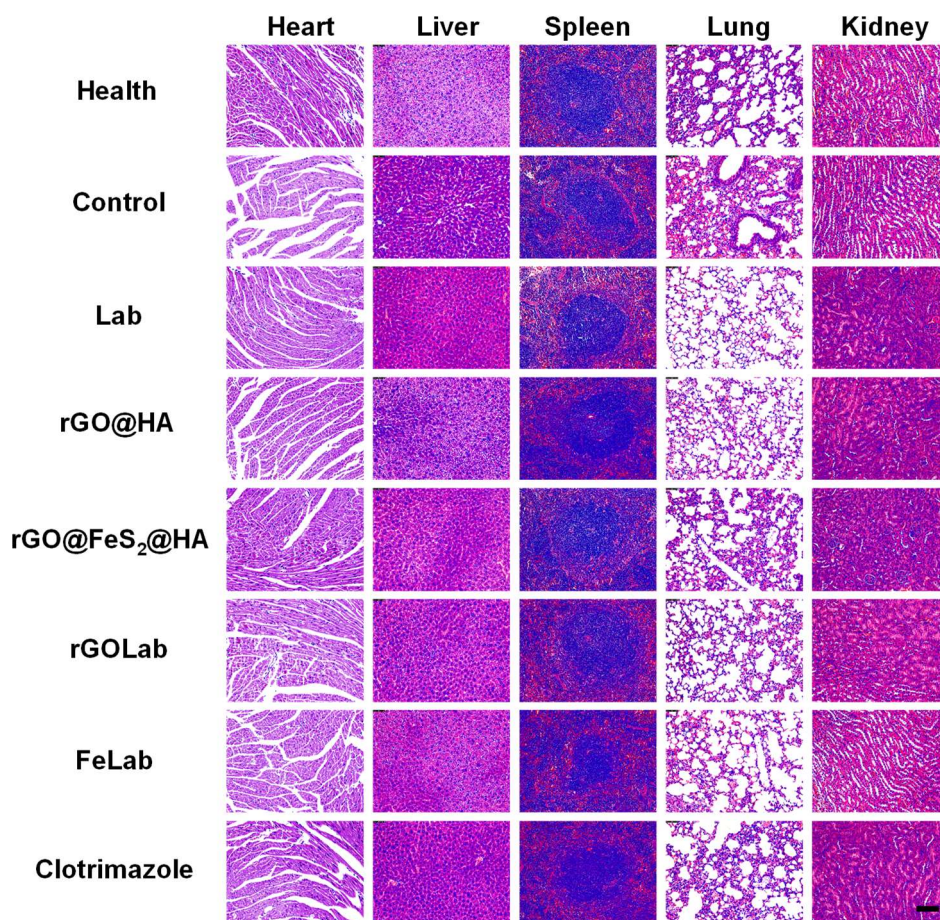

**Fig. S28.** HE staining images of the main organs of mice with *Candida albicans*-induced vaginitis after the indicated treatments. Scale bar: 100  $\mu$ m.

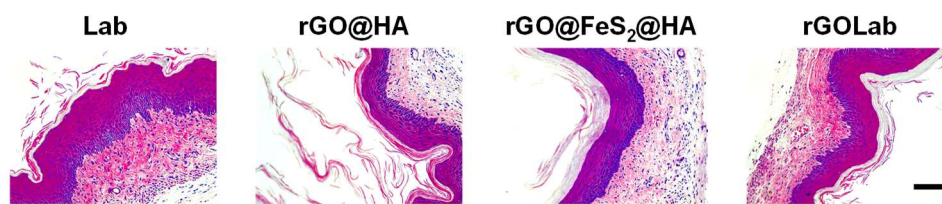

**Fig. S29.** HE staining images of the vaginal tissue with indicated treatments. Scale bar: 100  $\mu\text{m}$ .

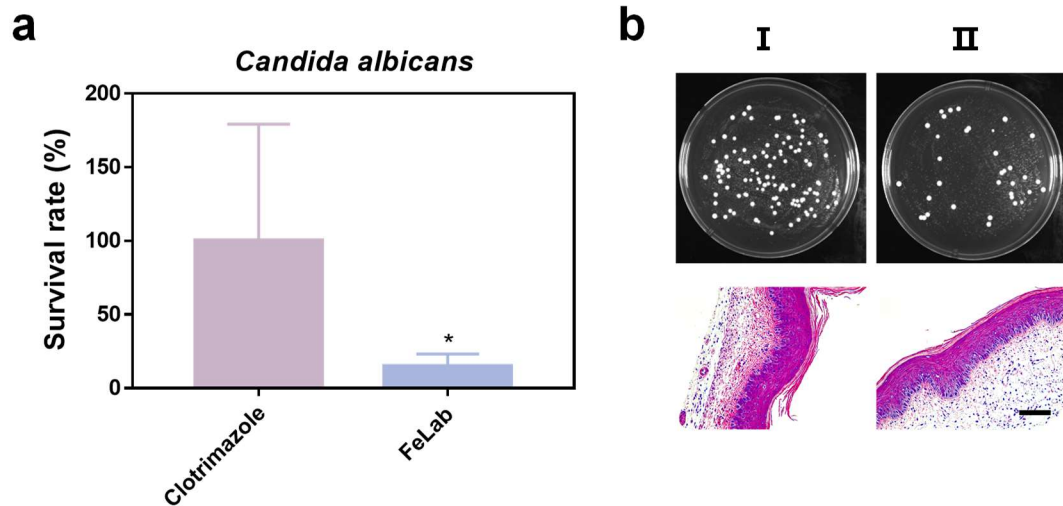

**Fig. S30. Comparing recurrence of *Candida* vaginitis between FeLab and Clotrimazole. a,** Cell viability of *Candida albicans* after indicated treatments. **b,** Digital images of *Candida albicans* colonies in the vaginal washes and HE staining images of the vaginal tissue of mice with recurrent *Candida* vaginitis treated with Clotrimazole (I) and FeLab (II). Scale bar: 100  $\mu$ m. Data are presented as mean  $\pm$  SD (n = 6).

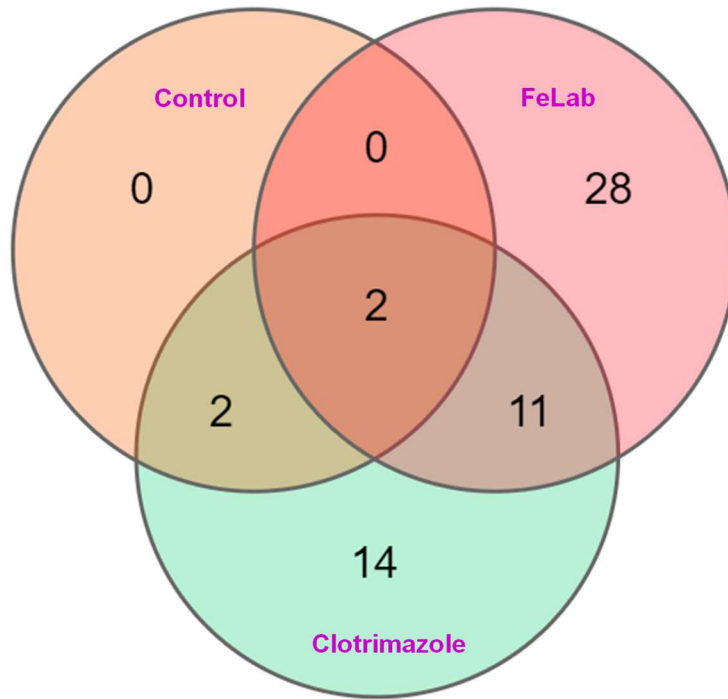

**Fig. S31. Venn diagram of the shared fungi in vaginal microbiome between FeLab and Clotrimazole treatments.**



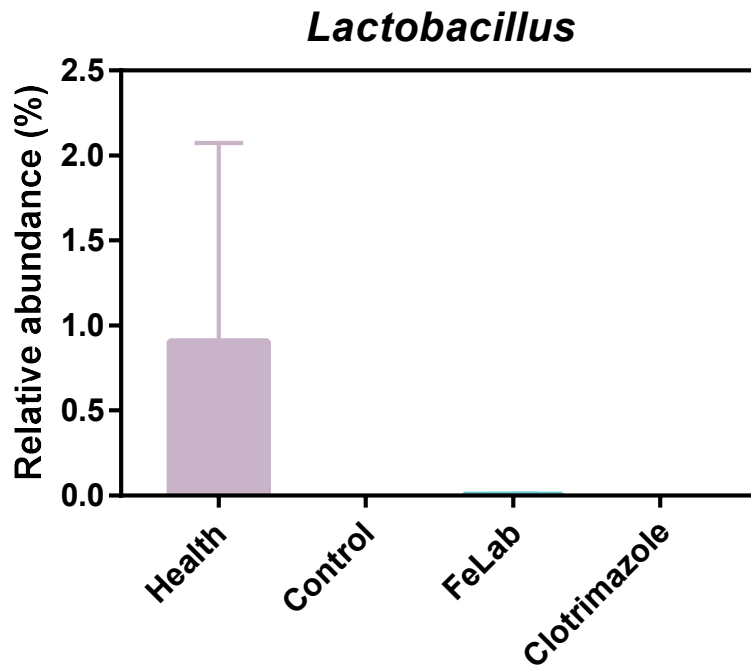

**Fig. S32.** Relative abundance of genus-level taxa for *Lactobacillus* between FeLab and Clotrimazole treatments. Data are presented as mean  $\pm$  SD (n = 4).

**Table S1. Catalytic activity and kinetic parameters for the POD-like activity of rGO@FeS<sub>2</sub>, Pt<sub>3</sub>Fe, Pyrite, and Fe<sub>3</sub>O<sub>4</sub> nanozymes with H<sub>2</sub>O<sub>2</sub> or TMB as substrate.**

| <b>Nanozymes</b>               | <b>Substrates</b>             | <b><math>K_m</math> (mM)</b> | <b><math>v_{max}</math> (nM/s)</b> | <b>Mass activity (nM/s/mg)</b> |
|--------------------------------|-------------------------------|------------------------------|------------------------------------|--------------------------------|
| rGO@FeS <sub>2</sub>           | H <sub>2</sub> O <sub>2</sub> | 0.019                        | 12.84                              | 513.6                          |
| rGO@FeS <sub>2</sub>           | TMB                           | 0.43                         | 28.75                              | 1150                           |
| Pt <sub>3</sub> Fe             | H <sub>2</sub> O <sub>2</sub> | 0.05                         | 4030                               | 1.14×10 <sup>8</sup>           |
| Pt <sub>3</sub> Fe             | TMB                           | 0.28                         | 5548                               | 1.57×10 <sup>8</sup>           |
| Pyrite                         | H <sub>2</sub> O <sub>2</sub> | 0.021                        | 5.38                               | 283.16                         |
| Pyrite                         | TMB                           | 6.42                         | 129                                | 6789.47                        |
| Fe <sub>3</sub> O <sub>4</sub> | H <sub>2</sub> O <sub>2</sub> | 0.01                         | 0.55                               | 157.14                         |
| Fe <sub>3</sub> O <sub>4</sub> | TMB                           | 0.66                         | 1.71                               | 488.57                         |
